# Supplementary material for: Relative Effectiveness of Cell-Cultured versus Egg-Based Seasonal Influenza Vaccines in Preventing Influenza-Related Outcomes in Subjects 18 Years Old or Older: A Systematic Review and Meta-Analysis
Source: Preprints.org preprint supplement (doi:10.20944/preprints202111.0132.v1), 2021-11-08
Supplement: Supplementary file 3 [file Table S2 Sensitivity Leave one out analysis.docx]

Table S2 Leave one out analysis, 2017-2018 and 2018-2019.

Random-effects model Method: REML

|  |  | |  |  |  |
| --- | --- | --- | --- | --- | --- |
| Season and Omitted study | aRR | | [95% conf. | interval] | p-value |
|  |  | |  |  |  |
| 2017-2018 Influenza season |  | |  |  |  |
| Boikos 2020a | 1.111 | | 1.084 | 1.138 | 0.000 |
| Bruxvoort 2019a | 1.110 | | 1.084 | 1.137 | 0.000 |
| Divino 2020 | 1.099 | | 1.055 | 1.145 | 0.000 |
| Eick-Cost 2018 | 1.112 | | 1.086 | 1.140 | 0.000 |
| Izurieta 2019b | 1.095 | | 1.021 | 1.175 | 0.011 |
| Klein 2020a | 1.111 | | 1.085 | 1.138 | 0.000 |
| Martin 2020c | 1.110 | | 1.084 | 1.137 | 0.000 |
|  |  | |  |  |  |
| exp(theta) | 1.110 | | 1.084 | 1.137 | 0.000 |
|  |  |  | |  |  |
| 2018-2019 influenza season |  |  | |  |  |
|  |  |  | |  |  |
| Boikos 2021d | 1.008 | 0.968 | | 1.051 | 0.691 |
| Boikos 2021c | 1.054 | 1.028 | | 1.082 | 0.000 |
| Fu Tseng 2019b | 1.028 | 0.986 | | 1.072 | 0.189 |
| Izurieta 2020a | 1.028 | 0.973 | | 1.087 | 0.327 |
| Krishnarajah 2021 | 1.023 | 0.972 | | 1.076 | 0.382 |
|  |  |  | |  |  |
| exp(theta) | 1.028 | 0.986 | | 1.071 | 0.195 |
