# Supplementary material for: Relative Effectiveness of Cell-Cultured versus Egg-Based Seasonal Influenza Vaccines in Preventing Influenza-Related Outcomes in Subjects 18 Years Old or Older: A Systematic Review and Meta-Analysis
Source: Preprints.org preprint supplement (doi:10.20944/preprints202111.0132.v1), 2021-11-08

Figure S3. Graphical and statistical bias analysis by season, age group, study design, reported outcome, outcome determination, funding and risk of bias. (I)

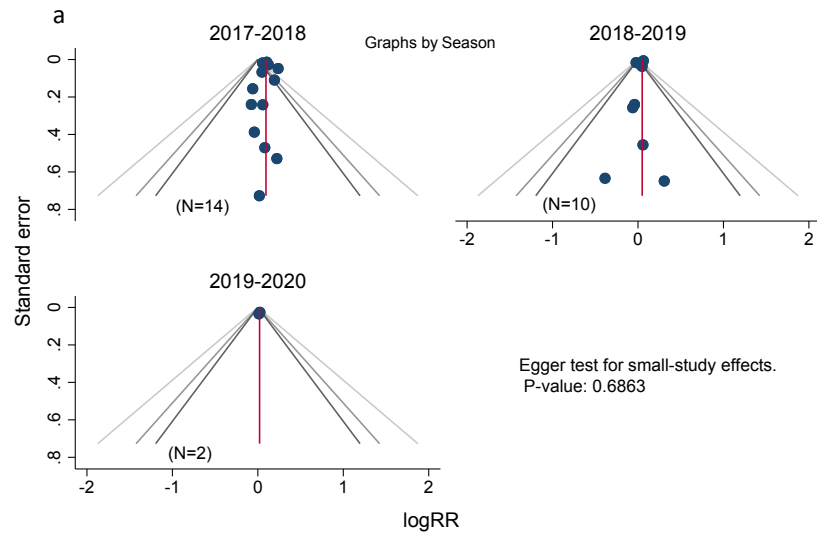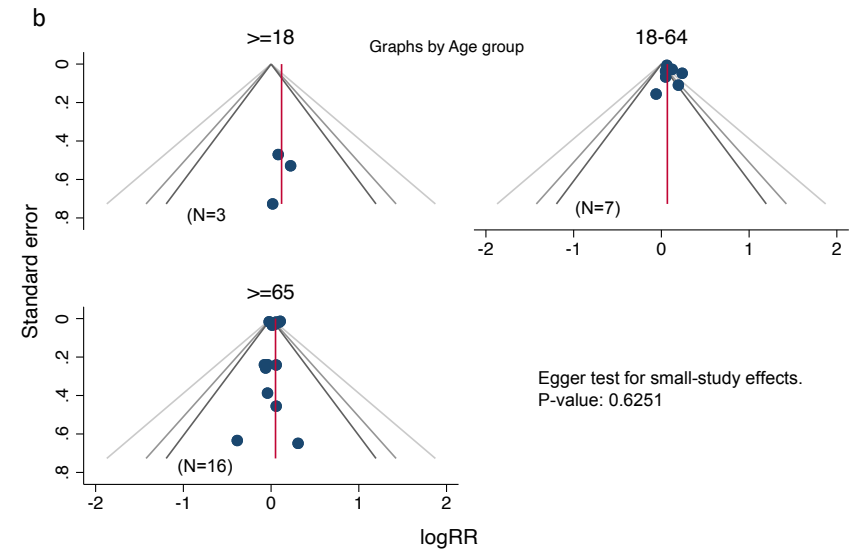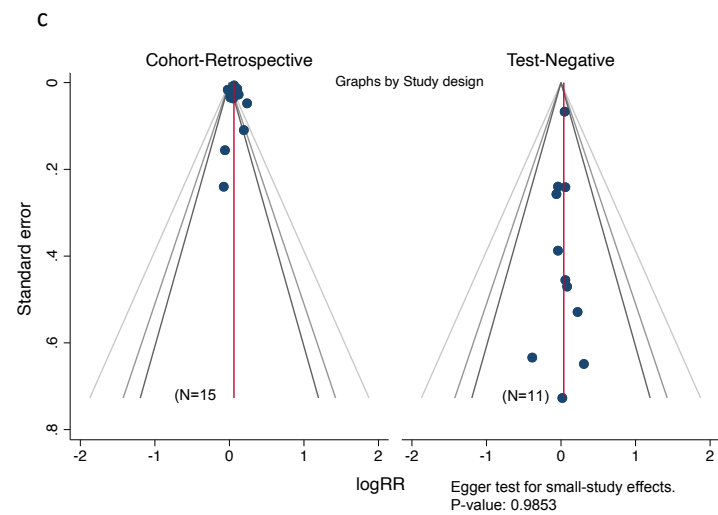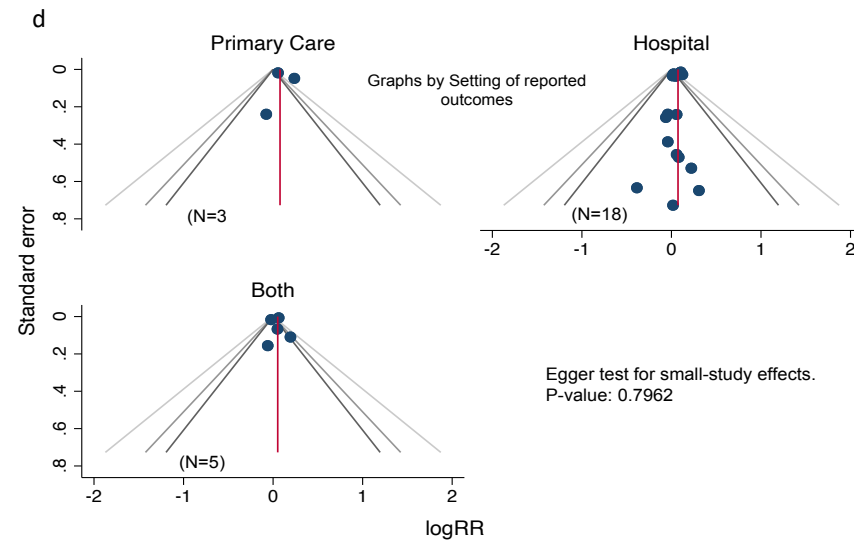

Figure S3. Graphical and statistical bias analysis by season, age group, study design, reported outcome, outcome determination, funding and risk of bias. (II)

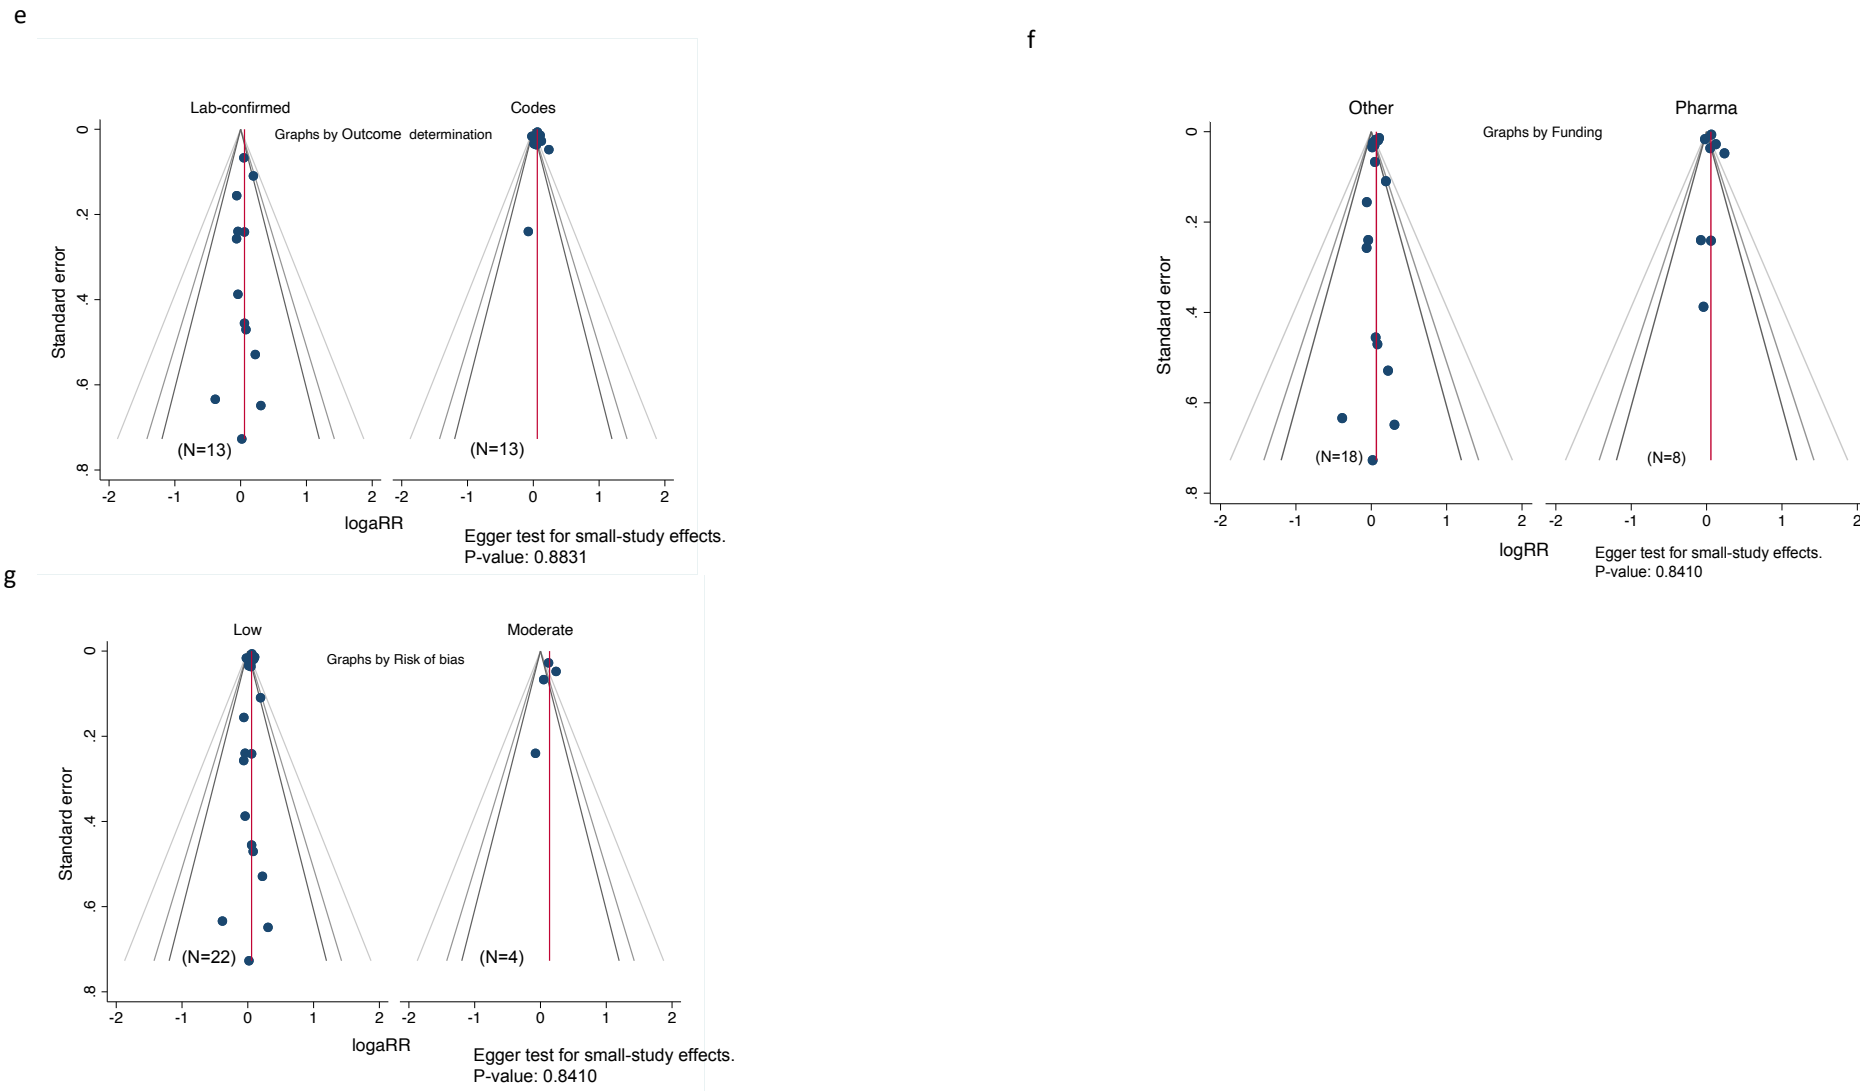

Supplement: Supplementary file 10 [file supplementary]
