# Supplementary material for: Relative Effectiveness of Cell-Cultured versus Egg-Based Seasonal Influenza Vaccines in Preventing Influenza-Related Outcomes in Subjects 18 Years Old or Older: A Systematic Review and Meta-Analysis
Source: Preprints.org preprint supplement (doi:10.20944/preprints202111.0132.v1), 2021-11-08
Supplement: Supplementary file 11 [file supplementary]

Archive with 17 entries (16 files):
- Supplemtary materials/
- Supplemtary materials/Table S1 Studies reporting relative vaccine effectiveness.xlsx
- __MACOSX/Supplemtary materials/._Table S1 Studies reporting relative vaccine effectiveness.xlsx
- Supplemtary materials/Figure S3 Asymetry bias Funnel plots by confounders or modifiers.pdf
- __MACOSX/Supplemtary materials/._Figure S3 Asymetry bias Funnel plots by confounders or modifiers.pdf
- Supplemtary materials/Figure S2 Asymetry bias Funnel Plot overall .pdf
- __MACOSX/Supplemtary materials/._Figure S2 Asymetry bias Funnel Plot overall .pdf
- Supplemtary materials/Figure S4 Sensitivity Nonparametric trim and fill ananlysisl 2017-2018.pdf
- __MACOSX/Supplemtary materials/._Figure S4 Sensitivity Nonparametric trim and fill ananlysisl 2017-2018.pdf
- Supplemtary materials/Figure S5 Sensitivity Non parametric trim and fill 2027-2018 no exclusions.pdf
- __MACOSX/Supplemtary materials/._Figure S5 Sensitivity Non parametric trim and fill 2027-2018 no exclusions.pdf
- Supplemtary materials/Figure S1 Heterogeneity other factors.pdf
- __MACOSX/Supplemtary materials/._Figure S1 Heterogeneity other factors.pdf
- Supplemtary materials/PRISMA_2020_checklist.docx
- __MACOSX/Supplemtary materials/._PRISMA_2020_checklist.docx
- Supplemtary materials/Table S2 Sensitivity Leave one out analysis.docx
- __MACOSX/Supplemtary materials/._Table S2 Sensitivity Leave one out analysis.docx
